# Supplementary material for: Patchy nanoparticles self-assembled from linear triblock copolymers under spherical confinement: a simulated annealing study
Source: Royal Society of Chemistry journal article supplement (doi:10.1039/c4sm00967c), 2014-01-01
Supplement: c4sm00967c1.pdf [file c4sm00967c1.pdf]

Supporting Information for

# Patchy nanoparticles self-assembled from linear triblock copolymers under spherical confinement: A simulated annealing study

Bin Yu, Jianhua Deng, Baohui Li, An-Chang Shi

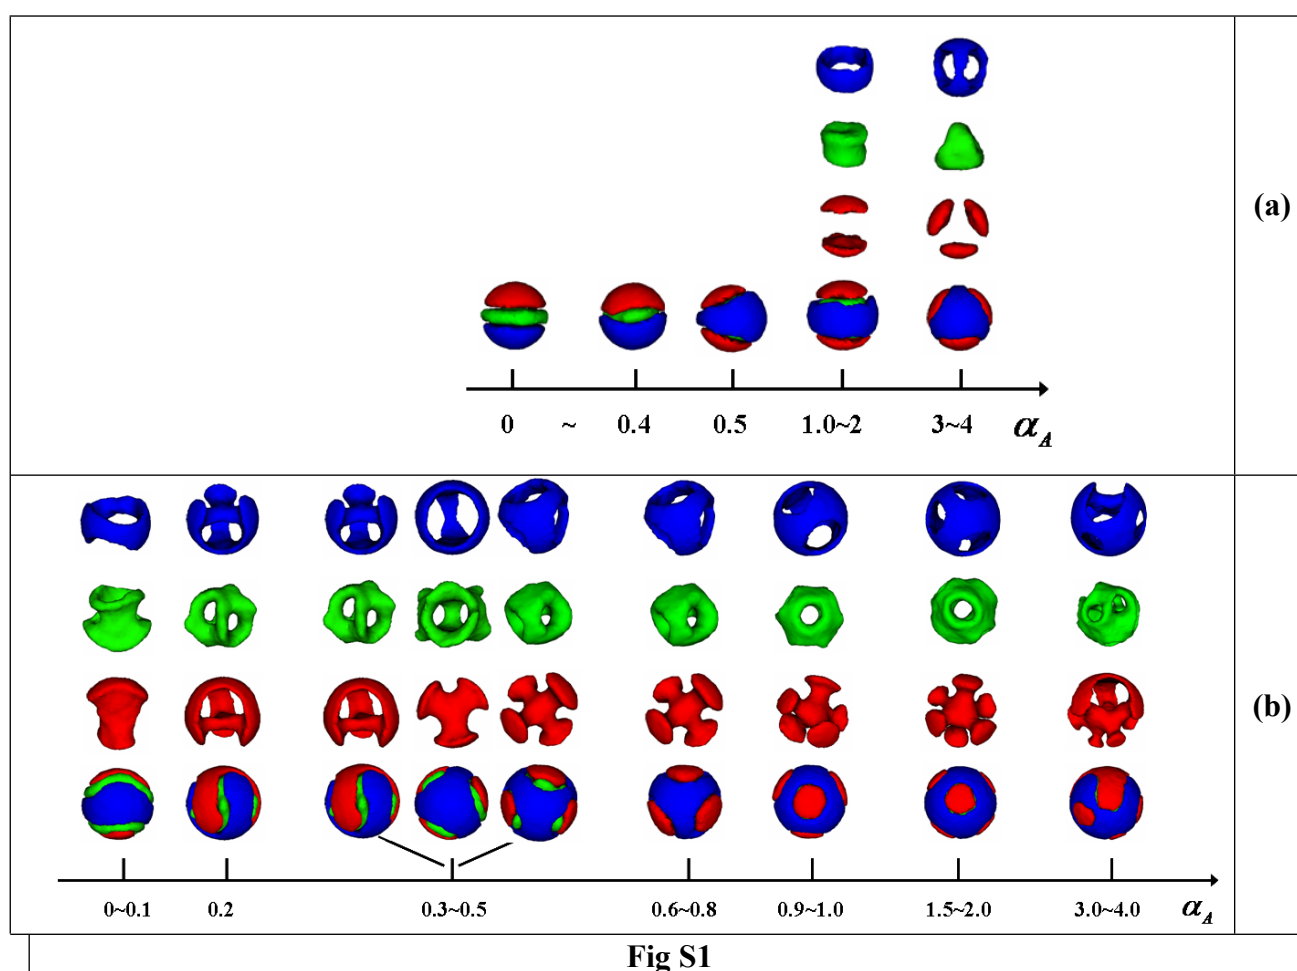

Fig S1

Figure S1. Self-assembled morphologies as a function of  $\alpha_A$  for triblock copolymers  $A_8B_8C_8$  confined in nanopores with  $\alpha_A=\alpha_C$ . (a)  $D/L_0=0.9$ ; (b)  $D/L_0=1.5$ .
